# Supplementary material for: Universal detection of phytoplasmas and Xylella spp. by TaqMan singleplex and multiplex real-time PCR with dual priming oligonucleotides
Source: PubMed Central journal article supplement (PMC5619750; doi:10.1371/journal.pone.0185427), 2017-09-28
Supplement: pone.0185427.s001.pdf [file pone.0185427.s001.pdf]

|                                                | UPH-F                          | UPH-Pb/UPH-P | UPH-R                        | D-UPHr2/UPHr2                         |
|------------------------------------------------|--------------------------------|--------------|------------------------------|---------------------------------------|
| P.asteris-M30790 (OY, PaWB, PvWB, RhY)         | 1: CGTACGCAAGTAT-GAAACTTAA-GGA | 1: TGACGGGA  | 1: TTGGAT-CATGTGTTPAATTGGAAG | 1: GGTTATCAGIIIIICAGGTGGTGCATGGTTGTCG |
| P.allocasuariae-AY135523 (AlloY)               | 1: . . . . .                   | 1: . . . . . | 1: . . . . .                 | 1: . . . . .                          |
| P.americanum-DQ174122                          | 1: . . . . .                   | 1: . . . . . | 1: . . . . .                 | 1: . . . . .                          |
| P.aurantifolia-U15442 (ChV, FBP)               | 1: . . . . .                   | 1: . . . . . | 1: . . . . .                 | 1: . . . . .                          |
| P.australasiae-Y10096 (PD-TWII, TBB)           | 1: . . . . .                   | 1: . . . . . | 1: . . . . .                 | 1: . . . . .                          |
| P.australiense-L76865 (AUSGY)                  | 1: . . . . .                   | 1: . . . . . | 1: . . . . .                 | 1: . . . . .                          |
| P.balanitae-AB689678                           | 1: . . . . .                   | 1: . . . . . | 1: . . . . .                 | 1: . . . . .                          |
| P.brasiliense-AF147708 (SuV)                   | 1: . . . . .                   | 1: . . . . . | 1: . . . . .                 | 1: . . . . .                          |
| P.caricae-AY725234                             | 1: . . . . .                   | 1: . . . . . | 1: . . . . .                 | 1: . . . . .                          |
| P.castaneae-AB054986 (CnWB)                    | 1: . . . . .                   | 1: . . . . . | 1: . . . . .                 | 1: . . . . .                          |
| P.cirsii-KR869146                              | 1: . . . . .                   | 1: . . . . . | 1: . . . . .                 | 1: . . . . .                          |
| P.cocostanzaniae-X80117 (LDT)                  | 1: . . . . .                   | 1: . . . . . | 1: . . . . .                 | 1: . . . . .                          |
| P.convolvuli-JN833705 (Convolvulus 57/11)      | 1: . . . . .                   | 1: . . . . . | 1: . . . . .                 | 1: . . . . .                          |
| P.costaricanum-HQ225630 (SoyStlcl)             | 1: . . . . .                   | 1: . . . . . | 1: . . . . .                 | 1: . . . . .                          |
| P.cynodontis-AJ550984                          | 1: . . . . .                   | 1: . . . . . | 1: . . . . .                 | 1: . . . . .                          |
| P.fragariae-DQ086423                           | 1: . . . . .                   | 1: . . . . . | 1: . . . . .                 | 1: . . . . .                          |
| P.fraxini-AF092209 (ASHY3)                     | 1: . . . . .                   | 1: . . . . . | 1: . . . . .                 | 1: . . . . .                          |
| P.graminis-AY725228                            | 1: . . . . .                   | 1: . . . . . | 1: . . . . .                 | 1: . . . . .                          |
| P.hispanicum-AF248960                          | 1: . . . . .                   | 1: . . . . . | 1: . . . . .                 | 1: . . . . .                          |
| P.japonicum-AB010425 (JHP)                     | 1: . . . . .                   | 1: . . . . . | 1: . . . . .                 | 1: . . . . .                          |
| P.luffae-AF086621                              | 1: . . . . .                   | 1: . . . . . | 1: . . . . .                 | 1: . . . . .                          |
| P.lycopersici-EF199549                         | 1: . . . . .                   | 1: . . . . . | 1: . . . . .                 | 1: . . . . .                          |
| P.malaysianum-EU371934                         | 1: . . . . .                   | 1: . . . . . | 1: . . . . .                 | 1: . . . . .                          |
| P.mali-AJ542541 (AP-15, AT, 12/93)             | 1: . . . . .                   | 1: . . . . . | 1: . . . . .                 | 1: . . . . .                          |
| P.omanense-EF666051                            | 1: . . . . .                   | 1: . . . . . | 1: . . . . .                 | 1: . . . . .                          |
| P.oryzae-AB052873 (RYD)                        | 1: . . . . .                   | 1: . . . . . | 1: . . . . .                 | 1: . . . . .                          |
| P.palmae-AF498307                              | 1: . . . . .                   | 1: . . . . . | 1: . . . . .                 | 1: . . . . .                          |
| P.palmicola-KF751387                           | 1: . . . . .                   | 1: . . . . . | 1: . . . . .                 | 1: . . . . .                          |
| P.phoenicium-AF515636 (NaxY)                   | 1: . . . . .                   | 1: . . . . . | 1: . . . . .                 | 1: . . . . .                          |
| P.pini-AJ310849                                | 1: . . . . .                   | 1: . . . . . | 1: . . . . .                 | 1: . . . . .                          |
| P.pruni-JQ044392 (GVX, GW)                     | 1: . . . . .                   | 1: . . . . . | 1: . . . . .                 | 1: . . . . .                          |
| P.prunorum-AJ542544 (ESFY, GESFY)              | 1: . . . . .                   | 1: . . . . . | 1: . . . . .                 | 1: . . . . .                          |
| P.pyri-AJ542543 (PD, PYLR)                     | 1: . . . . .                   | 1: . . . . . | 1: . . . . .                 | 1: . . . . .                          |
| P.rhamni-JQ868449                              | 1: . . . . .                   | 1: . . . . . | 1: . . . . .                 | 1: . . . . .                          |
| P.rubi-AY197648 (RuS)                          | 1: . . . . .                   | 1: . . . . . | 1: . . . . .                 | 1: . . . . .                          |
| P.solani-AF248959 (H618, TF19C57)              | 1: . . . . .                   | 1: . . . . . | 1: . . . . .                 | 1: . . . . .                          |
| P.spartii-X92869                               | 1: . . . . .                   | 1: . . . . . | 1: . . . . .                 | 1: . . . . .                          |
| P.sudamericanum-GU292081                       | 1: . . . . .                   | 1: . . . . . | 1: . . . . .                 | 1: . . . . .                          |
| P.tamaricis-F432664                            | 1: . . . . .                   | 1: . . . . . | 1: . . . . .                 | 1: . . . . .                          |
| P.trifolii-AY390261 (CP-1)                     | 1: . . . . .                   | 1: . . . . . | 1: . . . . .                 | 1: . . . . .                          |
| P.ulmi-AY197655 (ULM)                          | 1: . . . . .                   | 1: . . . . . | 1: . . . . .                 | 1: . . . . .                          |
| P.vitis-X76560 (FD1, FD2, W1, W2)              | 1: . . . . .                   | 1: . . . . . | 1: . . . . .                 | 1: . . . . .                          |
| P.ziziphi-AB052876 (JWB)                       | 1: . . . . .                   | 1: . . . . . | 1: . . . . .                 | 1: . . . . .                          |
| A possible new phytoplasma sp.-AY083605        | 1: . . . . .                   | 1: . . . . . | 1: . . . . .                 | 1: . . . . .                          |
| A possible new phytoplasma sp.-AF509322        | 1: . . . . .                   | 1: . . . . . | 1: . . . . .                 | 1: . . . . .                          |
| A possible new phytoplasma sp.-AF521672 (WTWB) | 1: . . . . .                   | 1: . . . . . | 1: . . . . .                 | 1: . . . . .                          |
| A possible new phytoplasma sp.-AJ539179        | 1: . . . . .                   | 1: . . . . . | 1: . . . . .                 | 1: . . . . .                          |
| A possible new phytoplasma sp.-AJ539180        | 1: . . . . .                   | 1: . . . . . | 1: . . . . .                 | 1: . . . . .                          |
| A possible new phytoplasma sp.-AY744945* (DP)  | 1: . . . . .                   | 1: . . . . . | 1: . . . . .                 | 1: . . . . .                          |
| (Other bacteria)                               |                                |              |                              |                                       |
| Acholeplasma brassicae-F0681348                | 1: . . . . .                   | 1: . . . . . | 1: . . . . .                 | 1: . . . . .                          |
| Acholeplasma laidlawii-U14905                  | 1: . . . . .                   | 1: . . . . . | 1: . . . . .                 | 1: . . . . .                          |
| Acholeplasma palmae-F0681347                   | 1: . . . . .                   | 1: . . . . . | 1: . . . . .                 | 1: . . . . .                          |
| Anaeroplasmata abactoclasticum-M25050          | 1: . . . . .                   | 1: . . . . . | 1: . . . . .                 | 1: . . . . .                          |
| Asteroleplasma anaerobium-M22351               | 1: . . . . .                   | 1: . . . . . | 1: . . . . .                 | 1: . . . . .                          |
| Entomoplasmata ellychniae-JX843735             | 1: . . . . .                   | 1: . . . . . | 1: . . . . .                 | 1: . . . . .                          |
| Haloplasmata contractile-EF999972              | 1: . . . . .                   | 1: . . . . . | 1: . . . . .                 | 1: . . . . .                          |
| Mesoplasmata florum-AF300327                   | 1: . . . . .                   | 1: . . . . . | 1: . . . . .                 | 1: . . . . .                          |
| Mycoplasmata mycolides-BX293980                | 1: . . . . .                   | 1: . . . . . | 1: . . . . .                 | 1: . . . . .                          |
| Spiroplasma citri-X63781                       | 1: . . . . .                   | 1: . . . . . | 1: . . . . .                 | 1: . . . . .                          |
| Ureaplasma urealyticum-AF073450                | 1: . . . . .                   | 1: . . . . . | 1: . . . . .                 | 1: . . . . .                          |
| Agrobacterium tumefaciens-D14500               | 1: . . . . .                   | 1: . . . . . | 1: . . . . .                 | 1: . . . . .                          |
| Arthrobacter globiformis-X80736                | 1: . . . . .                   | 1: . . . . . | 1: . . . . .                 | 1: . . . . .                          |
| Bacillus subtilis-AJ276351                     | 1: . . . . .                   | 1: . . . . . | 1: . . . . .                 | 1: . . . . .                          |
| Burkholderia cepacia-U96927                    | 1: . . . . .                   | 1: . . . . . | 1: . . . . .                 | 1: . . . . .                          |
| Clavibacter michiganensis-X77435               | 1: . . . . .                   | 1: . . . . . | 1: . . . . .                 | 1: . . . . .                          |
| Erwinia amylovora-AJ233410                     | 1: . . . . .                   | 1: . . . . . | 1: . . . . .                 | 1: . . . . .                          |
| Escherichia coli-X80725                        | 1: . . . . .                   | 1: . . . . . | 1: . . . . .                 | 1: . . . . .                          |
| Faenibacillus polymyxa-CP000154                | 1: . . . . .                   | 1: . . . . . | 1: . . . . .                 | 1: . . . . .                          |
| Pseudomonas aeruginosa-HE978271                | 1: . . . . .                   | 1: . . . . . | 1: . . . . .                 | 1: . . . . .                          |
| Ralstonia pickettii-AY741342                   | 1: . . . . .                   | 1: . . . . . | 1: . . . . .                 | 1: . . . . .                          |
| Rhizobium leguminosarum-U29386                 | 1: . . . . .                   | 1: . . . . . | 1: . . . . .                 | 1: . . . . .                          |
| Xylophilus ampelinus-AJ420330                  | 1: . . . . .                   | 1: . . . . . | 1: . . . . .                 | 1: . . . . .                          |
