# Supplementary material for: Universal detection of phytoplasmas and Xylella spp. by TaqMan singleplex and multiplex real-time PCR with dual priming oligonucleotides
Source: PubMed Central journal article supplement (PMC5619750; doi:10.1371/journal.pone.0185427), 2017-09-28
Supplement: pone.0185427.s002.pdf [file pone.0185427.s002.pdf]

|                                                                  | D-XrDr2/D-XrDr9/XrDr2                                                                                                                  | XrD-F/XrD-Pf      | XrDf1               |
|------------------------------------------------------------------|----------------------------------------------------------------------------------------------------------------------------------------|-------------------|---------------------|
| <i>X. fastidiosa</i> subsp. <i>fastidiosa</i> -AF192343 (PCE-RR) | 1:CGGACGGCAGCACAITGGTA--IIIIIIACCATGGG                                                                                                 | AAGCAGGGGACCTTAGC | TTGTGCGATTGGATGAGCC |
| -AB009442 (Temecula1)                                            | 1:.....T.....-GTAAT.....TGGCAGTGGCGGACGGGTGAGGAATACATCGGAATACCTTATCTGTTGGGGACAACTAGGGAAACTACGCTAATAACGCATACGACCTACGGGTG                |                   | GCC                 |
| -AF536764 (ELM-1)                                                | 1:.....T.....-GTAAT.....TGGCAGTGGCGGACGGGTGAGGAATACATCGGAATACCTTATCTGTTGGGGACAACTAGGGAAACTACGCTAATAACGCATACGACCTACGGGTG                |                   |                     |
| -AF536770 (ALS-BC)                                               | 1:.....G.....TCA.....TGGCAGTGGCGGACGGGTGAGGAATACATCGGAATACCTTATCTGTTGGGGACAACTAGGGAAACTACGCTAATAACGCATACGACCTACGGGTG                   |                   |                     |
| -CP001011 (M23)                                                  | 1:.....T.....-GTAAT.....TGGCAGTGGCGGACGGGTGAGGAATACATCGGAATACCTTATCTGTTGGGGACAACTAGGGAAACTACGCTAATAACGCATACGACCTACGGGTG                |                   |                     |
| -CP002165 (GB514)                                                | 1:.....T.....-GTAAT.....TGGCAGTGGCGGACGGGTGAGGAATACATCGGAATACCTTATCTGTTGGGGACAACTAGGGAAACTACGCTAATAACGCATACGACCTACGGGTG                |                   |                     |
| -CP006696 (Ann 1)                                                | 1:.....T.....-GTAAT.....TGGCAGTGGCGGACGGGTGAGGAATACATCGGAATACCTTATCTGTTGGGGACAACTAGGGAAACTACGCTAATAACGCATACGACCTACGGGTG                |                   |                     |
| -CP006740 (MUL0034)                                              | 1:.....T.....-GTAAT.....TGGCAGTGGCGGACGGGTGAGGAATACATCGGAATACCTTATCTGTTGGGGACAACTAGGGAAACTACGCTAATAACGCATACGACCTACGGGTG                |                   |                     |
| <i>X. fastidiosa</i> subsp. <i>multiplex</i> -CP000941 (M12)     | 1:.....T.....-GTAAT.....TGGCAGTGGCGGACGGGTGAGGAATACATCGGAATACCTTATCTGTTGGGGACAACTAGGGAAACTACGCTAATAACGCATACGACCTACGGGTG                |                   |                     |
| -AF159577 (OSL92-3)                                              | 1:.....T.....-GTAAT.....TGGCAGTGGCGGACGGGTGAGGAATACATCGGAATACCTTATCTGTTGGGGACAACTAGGGAAACTACGCTAATAACGCATACGACCTACGGGTG                |                   |                     |
| -AF159578 (FWT-22)                                               | 1:.....T.....-GTAAT.....TGGCAGTGGCGGACGGGTGAGGAATACATCGGAATACCTTATCTGTTGGGGACAACTAGGGAAACTACGCTAATAACGCATACGACCTACGGGTG                |                   |                     |
| -AF203388 (PL.788)*                                              | 1:A.....G.....-CG...T.....TGGCAGTGGCGGACGGGTGAGGAATACATCGGAATACCTTATCTGTTGGGGACAACTAGGGAAACTACGCTAATAACGCATACGACCTACGGGTG              |                   |                     |
| -AF536761 (PLM G83)                                              | 1:.....T.....-GTAAT.....TGGCAGTGGCGGACGGGTGAGGAATACATCGGAATACCTTATCTGTTGGGGACAACTAGGGAAACTACGCTAATAACGCATACGACCTACGGGTG                |                   |                     |
| -AF536762 (RGW-R)                                                | 1:.....T.....-GTAAT.....TGGCAGTGGCGGACGGGTGAGGAATACATCGGAATACCTTATCTGTTGGGGACAACTAGGGAAACTACGCTAATAACGCATACGACCTACGGGTG                |                   |                     |
| -DQ991188 (2-5)                                                  | 1:.....T.....-GTAAT.....TGGCAGTGGCGGACGGGTGAGGAATACATCGGAATACCTTATCTGTTGGGGACAACTAGGGAAACTACGCTAATAACGCATACGACCTACGGGTG                |                   |                     |
| -DQ991190 (4BD2)                                                 | 1:.....C.....TGGCAGTGGCGGACGGGTGAGGAATACATCGGAATACCTTATCTGTTGGGGACAACTAGGGAAACTACGCTAATAACGCATACGACCTACGGGTG                           |                   |                     |
| -DQ991192 (SLS27)                                                | 1:.....T.....-GTAAT.....TGGCAGTGGCGGACGGGTGAGGAATACATCGGAATACCTTATCTGTTGGGGACAACTAGGGAAACTACGCTAATAACGCATACGACCTACGGGTG                |                   |                     |
| <i>X. fastidiosa</i> subsp. <i>pauca</i> -AE003849 (9a5c)        | 1:.....G.....-TGGCAGTGGCGGACGGGTGAGGAATACATCGGAATACCTTATCTGTTGGGGACAACTAGGGAAACTACGCTAATAACGCATACGACCTACGGGTG                          |                   |                     |
| -AF203390 (CO.01)                                                | 1:.....G.....-TGGCAGTGGCGGACGGGTGAGGAATACATCGGAATACCTTATCTGTTGGGGACAACTAGGGAAACTACGCTAATAACGCATACGACCTACGGGTG                          |                   |                     |
| -AF536767 (CMI)                                                  | 1:.....G.....-TGGCAGTGGCGGACGGGTGAGGAATACATCGGAATACCTTATCTGTTGGGGACAACTAGGGAAACTACGCTAATAACGCATACGACCTACGGGTG                          |                   |                     |
| -LM994844 (1408)                                                 | 1:NNNNN.....TGGCAGTGGCGGACGGGTGAGGAATACATCGGAATACCTTATCTGTTGGGGACAACTAGGGAAACTACGCTAATAACGCATACGACCTACGGGTG                            |                   |                     |
| <i>X. taiwanensis</i> -AF203392 (PE. PLS)*                       | 1:A.....G.....-CG...T.....TGGCAGTGGCGGACGGGTGAGGAATACATCGGAATACCTTATCTGTTGGGGACAACTAGGGAAACTACGCTAATAACGCATACGACCTACGGGTG              |                   |                     |
| (Other bacteria)                                                 |                                                                                                                                        |                   |                     |
| <i>Xanthomonas albilineans</i> -X95918                           | 1:A.....G.....-C.....TGGCAGTGGCGGACGGGTGAGGAATACATCGGAATACCTTATCTGTTGGGGACAACTAGGGAAACTACGCTAATAACGCATACGACCTACGGGTG                   |                   |                     |
| <i>Xanthomonas arboricola</i> -Y10757                            | 1:A.....G.AAG.GCT.GC.CTT.....TGGCAGTGGCGGACGGGTGAGGAATACATCGGAATACCTTATCTGTTGGGGACAACTAGGGAAACTACGCTAATAACGCATACGACCTACGGGTG           |                   |                     |
| <i>Xanthomonas campestris</i> -AE008922                          | 1:A.....G.AAG.GCT.GC.CTT.....TGGCAGTGGCGGACGGGTGAGGAATACATCGGAATACCTTATCTGTTGGGGACAACTAGGGAAACTACGCTAATAACGCATACGACCTACGGGTG           |                   |                     |
| <i>Xanthomonas oryzae</i> -X95921                                | 1:A.....G.AAG.GCT.GC.CTT.....TGGCAGTGGCGGACGGGTGAGGAATACATCGGAATACCTTATCTGTTGGGGACAACTAGGGAAACTACGCTAATAACGCATACGACCTACGGGTG           |                   |                     |
| <i>Xanthomonas citri</i> -CP003778                               | 1:A.....G.AAG.GCT.GC.CTT.....TGGCAGTGGCGGACGGGTGAGGAATACATCGGAATACCTTATCTGTTGGGGACAACTAGGGAAACTACGCTAATAACGCATACGACCTACGGGTG           |                   |                     |
| <i>Aquimonas voraii</i> -AY544768                                | 1:A.....G.GGG..C.....C.....TGGCAGTGGCGGACGGGTGAGGAATACATCGGAATACCTTATCTGTTGGGGACAACTAGGGAAACTACGCTAATAACGCATACGACCTACGGGTG             |                   |                     |
| <i>Arenimonas donghaensis</i> -DQ411038                          | 1:AG.....G..AG.GCT.GC.CT.....C.....TGGCAGTGGCGGACGGGTGAGGAATACATCGGAATACCTTATCTGTTGGGGACAACTAGGGAAACTACGCTAATAACGCATACGACCTACGGGTG     |                   |                     |
| <i>Dokdonella koreensis</i> -AY987368                            | 1:AG.....G.GGG..C.....C.....TGGCAGTGGCGGACGGGTGAGGAATACATCGGAATACCTTATCTGTTGGGGACAACTAGGGAAACTACGCTAATAACGCATACGACCTACGGGTG            |                   |                     |
| <i>Dyella japonica</i> -AB110498                                 | 1:A.....GCA...-C.....TG.....TGGCAGTGGCGGACGGGTGAGGAATACATCGGAATACCTTATCTGTTGGGGACAACTAGGGAAACTACGCTAATAACGCATACGACCTACGGGTG            |                   |                     |
| <i>Frateuria aurantia</i> -AE091194                              | 1:A.....G-CAG.GCT.GC.-TG.....TGGCAGTGGCGGACGGGTGAGGAATACATCGGAATACCTTATCTGTTGGGGACAACTAGGGAAACTACGCTAATAACGCATACGACCTACGGGTG           |                   |                     |
| <i>Fulvimonas soli</i> -AJ311653                                 | 1:A.....G-A.G.GCT.GC.-T.....TGGCAGTGGCGGACGGGTGAGGAATACATCGGAATACCTTATCTGTTGGGGACAACTAGGGAAACTACGCTAATAACGCATACGACCTACGGGTG            |                   |                     |
| <i>Luteibacter rhizovicinus</i> -AJ580498                        | 1:A.....G-CAG.GCT.GC.-TG.....TGGCAGTGGCGGACGGGTGAGGAATACATCGGAATACCTTATCTGTTGGGGACAACTAGGGAAACTACGCTAATAACGCATACGACCTACGGGTG           |                   |                     |
| <i>Luteimonas mephitis</i> -AJ012228                             | 1:A.....A...G.GCT.GC.-C.....TGGCAGTGGCGGACGGGTGAGGAATACATCGGAATACCTTATCTGTTGGGGACAACTAGGGAAACTACGCTAATAACGCATACGACCTACGGGTG            |                   |                     |
| <i>Lysobacter enzymogenes</i> -AJ298291                          | 1:A.....G-A.G.GCT.GC.-T.....TGGCAGTGGCGGACGGGTGAGGAATACATCGGAATACCTTATCTGTTGGGGACAACTAGGGAAACTACGCTAATAACGCATACGACCTACGGGTG            |                   |                     |
| <i>Metallibacterium scheffleri</i> -HQ909259                     | 1:AG.....G.GGG..C.....C.....TGGCAGTGGCGGACGGGTGAGGAATACATCGGAATACCTTATCTGTTGGGGACAACTAGGGAAACTACGCTAATAACGCATACGACCTACGGGTG            |                   |                     |
| <i>Pseudoxanthomonas broegbernensis</i> -AJ012231                | 1:A.....G..AG.GCT.GC.-TC.....TGGCAGTGGCGGACGGGTGAGGAATACATCGGAATACCTTATCTGTTGGGGACAACTAGGGAAACTACGCTAATAACGCATACGACCTACGGGTG           |                   |                     |
| <i>Rudaea cellulolytica</i> -EU741687                            | 1:A.....GCA...-C.....TG.....TGGCAGTGGCGGACGGGTGAGGAATACATCGGAATACCTTATCTGTTGGGGACAACTAGGGAAACTACGCTAATAACGCATACGACCTACGGGTG            |                   |                     |
| <i>Stenotrophomonas maltophilia</i> -AB294555                    | 1:A.....G..AG.GCT.GC.-TC.....TGGCAGTGGCGGACGGGTGAGGAATACATCGGAATACCTTATCTGTTGGGGACAACTAGGGAAACTACGCTAATAACGCATACGACCTACGGGTG           |                   |                     |
| <i>Thermomonas haemolytica</i> -AJ300185                         | 1:A.....G-T.G.GCT.GC.-.....TGGCAGTGGCGGACGGGTGAGGAATACATCGGAATACCTTATCTGTTGGGGACAACTAGGGAAACTACGCTAATAACGCATACGACCTACGGGTG             |                   |                     |
| <i>Burkholderia cepacia</i> -U96927                              | 1:A.....GGGT.CT----TG.ACCT.....TGGCAGTGGCGGACGGGTGAGGAATACATCGGAATACCTTATCTGTTGGGGACAACTAGGGAAACTACGCTAATAACGCATACGACCTACGGGTG         |                   |                     |
| <i>Erwinia amylovora</i> -AJ233410                               | 1:A...T...G-AG.GCT.GC.-T.....TGGCAGTGGCGGACGGGTGAGGAATACATCGGAATACCTTATCTGTTGGGGACAACTAGGGAAACTACGCTAATAACGCATACGACCTACGGGTG           |                   |                     |
| <i>Escherichia coli</i> -X80725                                  | 1:A...T.A...GGA-A.C.GCT.GC.G-T-T.C.....TGGCAGTGGCGGACGGGTGAGGAATACATCGGAATACCTTATCTGTTGGGGACAACTAGGGAAACTACGCTAATAACGCATACGACCTACGGGTG |                   |                     |
| <i>Ralstonia pickettii</i> -AY741342                             | 1:A.....TGA-TC..GCT.GC.-G..T.A.....TGGCAGTGGCGGACGGGTGAGGAATACATCGGAATACCTTATCTGTTGGGGACAACTAGGGAAACTACGCTAATAACGCATACGACCTACGGGTG     |                   |                     |
