# Supplementary material for: Universal detection of phytoplasmas and Xylella spp. by TaqMan singleplex and multiplex real-time PCR with dual priming oligonucleotides
Source: PubMed Central journal article supplement (PMC5619750; doi:10.1371/journal.pone.0185427), 2017-09-28
Supplement: pone.0185427.s003.pdf [file pone.0185427.s003.pdf]

(A)

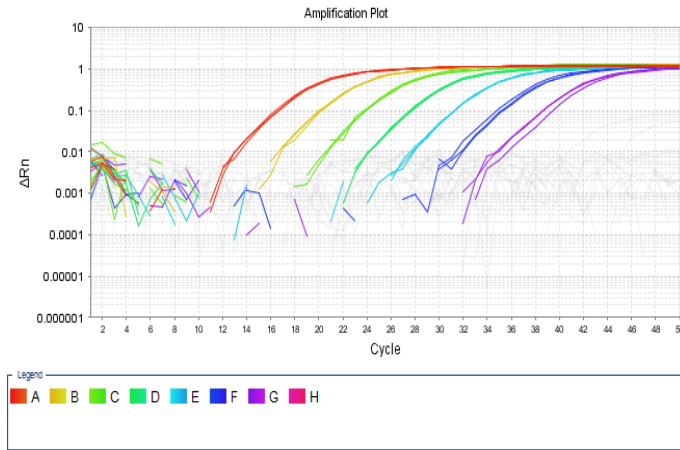

Standard Curve

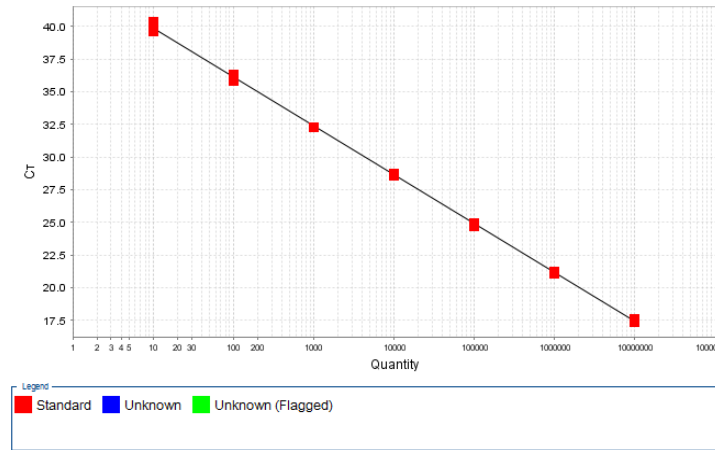

Slope:-3.734, Y-inter:43.576,  $R^2$ :0.999, Eff(%):85.284

(B)

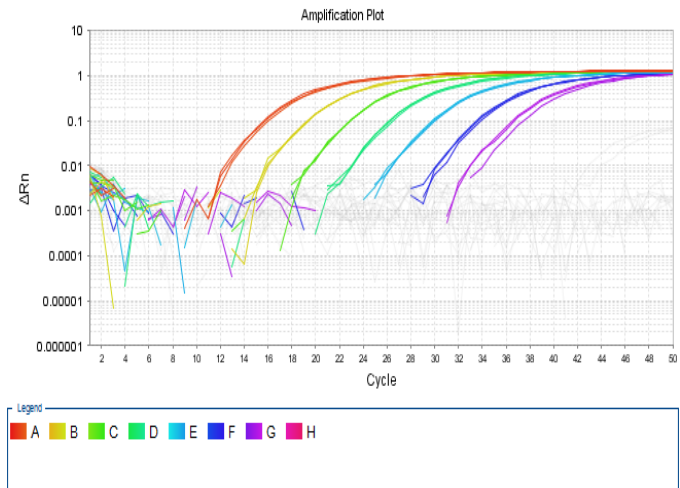

Standard Curve

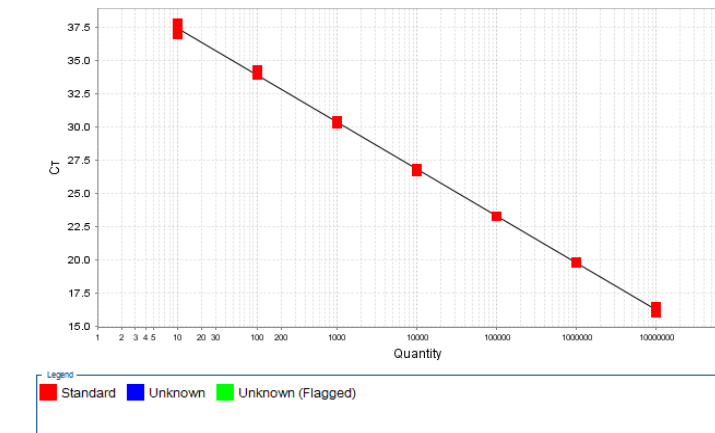

Slope:-3.536, Y-inter:40.94,  $R^2$ :0.999, Eff(%):91.799
