# Supplementary material for: Universal detection of phytoplasmas and Xylella spp. by TaqMan singleplex and multiplex real-time PCR with dual priming oligonucleotides
Source: PubMed Central journal article supplement (PMC5619750; doi:10.1371/journal.pone.0185427), 2017-09-28
Supplement: pone.0185427.s004.pdf [file pone.0185427.s004.pdf]

|      |                                  | P1        | P2  | P3  | P4  | P5  | P6  | P7  | P8   | P9   | P10  | P11 | P12  | P13  | P14  | P15  | P16  | P17  | P18  | P19  | P20  | P21  | P22  | P23 | P24  | P25  | P26  | P27  | P28  | P29  | P30 | P31  | P32  | P33  | P34  | P35  | P36  | O1   | O2   | O3   | O4   | O5   | O6   | O7   |      |      |      |    |    |    |    |    |    |
|------|----------------------------------|-----------|-----|-----|-----|-----|-----|-----|------|------|------|-----|------|------|------|------|------|------|------|------|------|------|------|-----|------|------|------|------|------|------|-----|------|------|------|------|------|------|------|------|------|------|------|------|------|------|------|------|----|----|----|----|----|----|
| P1)  | <i>P.asteris</i> -M30790         | 16SrI     | 100 | 99  | 88  | 88  | 88  | 90  | 88   | 92   | 91   | 88  | 91   | 91   | 92   | 90   | 85   | 91   | 95   | 95   | 96   | 98   | 97.2 | 88  | 97.3 | 96   | 88   | 92   | 88   | 98   | 89  | 88   | 91   | 96   | 89   | 88   | 95   | 90   | 91   | 86   | 87   | 85   | 79   | 80   | 83   |      |      |    |    |    |    |    |    |
| P2)  | <i>P.lycopersici</i> -EF199549   | 16SrI     |     | 100 | 89  | 89  | 87  | 89  | 88   | 91   | 90   | 87  | 90   | 90   | 91   | 89   | 86   | 90   | 94   | 94   | 95   | 97.2 | 96   | 89  | 96   | 95   | 88   | 91   | 87   | 97.2 | 88  | 88   | 90   | 95   | 88   | 87   | 94   | 91   | 90   | 86   | 87   | 84   | 78   | 79   | 82   |      |      |    |    |    |    |    |    |
| P3)  | <i>P.aurantifolia</i> -U15442    | 16SrII    |     |     | 100 | 96  | 89  | 88  | 88   | 89   | 86   | 89  | 88   | 88   | 87   | 88   | 88   | 93   | 91   | 90   | 90   | 89   | 98   | 90  | 92   | 88   | 88   | 88   | 88   | 87   | 90  | 88   | 84   | 88   | 90   | 88   | 89   | 88   | 85   | 84   | 83   | 77   | 78   | 79   |      |      |      |    |    |    |    |    |    |
| P4)  | <i>P.australasiae</i> -Y10096    | 16SrII    |     |     |     | 100 | 91  | 88  | 88   | 90   | 89   | 88  | 89   | 89   | 90   | 90   | 89   | 90   | 93   | 92   | 90   | 90   | 89   | 96  | 90   | 92   | 85   | 87   | 87   | 88   | 88  | 94   | 89   | 84   | 92   | 92   | 88   | 91   | 89   | 87   | 86   | 82   | 77   | 78   | 77   |      |      |    |    |    |    |    |    |
| P5)  | <i>P.pruni</i> -JQ044392         | 16SrIII   |     |     |     |     | 100 | 92  | 93   | 94   | 95   | 89  | 94   | 93   | 93   | 96   | 93   | 93   | 88   | 91   | 91   | 89   | 88   | 91  | 90   | 91   | 90   | 93   | 88   | 91   | 94  | 93   | 83   | 96   | 92   | 87   | 92   | 91   | 87   | 88   | 87   | 80   | 81   | 79   |      |      |      |    |    |    |    |    |    |
| P6)  | <i>P.palmae</i> -AF498307        | 16SrIV    |     |     |     |     |     | 100 | 97.2 | 98   | 97.2 | 91  | 95   | 97.2 | 96   | 96   | 90   | 97.2 | 89   | 92   | 88   | 90   | 89   | 88  | 90   | 92   | 96   | 98   | 95   | 90   | 99  | 89   | 99   | 86   | 93   | 91   | 89   | 96   | 97.2 | 92   | 94   | 90   | 86   | 87   | 85   |      |      |    |    |    |    |    |    |
|      | A possible phytoplasma-AJ539179  | 16SrXXVI  |     |     |     |     |     |     | 100  | 97.2 | 91   | 95  | 97.2 | 96   | 96   | 90   | 97.2 | 89   | 92   | 88   | 90   | 89   | 88   | 90  | 92   | 96   | 98   | 95   | 90   | 99   | 89  | 99   | 86   | 93   | 91   | 89   | 96   | 97.2 | 92   | 94   | 90   | 86   | 87   | 85   |      |      |      |    |    |    |    |    |    |
| P7)  | <i>P.cocostanzaniae</i> -X80117  | 16SrXV    |     |     |     |     |     |     |      | 100  | 95   | 96  | 89   | 94   | 94   | 93   | 93   | 93   | 94   | 88   | 90   | 88   | 88   | 88  | 89   | 89   | 90   | 95   | 95   | 96   | 88  | 96   | 88   | 96   | 84   | 92   | 90   | 88   | 93   | 94   | 90   | 91   | 89   | 83   | 86   | 82   |      |    |    |    |    |    |    |
| P8)  | <i>P.balanitae</i> -AB689678     | 16SrV     |     |     |     |     |     |     |      |      | 100  | 99  | 93   | 97.2 | 99   | 98   | 98   | 90   | 99   | 91   | 94   | 90   | 92   | 91  | 90   | 92   | 94   | 94   | 96   | 93   | 92  | 97.2 | 91   | 99   | 88   | 95   | 93   | 91   | 98   | 97.2 | 92   | 94   | 89   | 85   | 86   | 84   |      |    |    |    |    |    |    |
|      | <i>P.rubi</i> -AY197648          | 16SrV     |     |     |     |     |     |     |      |      |      | 100 | 99   | 93   | 97.2 | 99   | 98   | 98   | 90   | 99   | 91   | 94   | 90   | 92  | 91   | 90   | 92   | 94   | 94   | 96   | 93  | 92   | 97.2 | 91   | 99   | 88   | 95   | 93   | 91   | 98   | 97.2 | 92   | 94   | 89   | 85   | 86   | 84   |    |    |    |    |    |    |
|      | <i>P.ulmi</i> -AY197655          | 16SrV     |     |     |     |     |     |     |      |      |      |     | 100  | 99   | 93   | 97.2 | 99   | 98   | 98   | 90   | 99   | 91   | 94   | 90  | 92   | 91   | 90   | 92   | 94   | 94   | 96  | 93   | 92   | 97.2 | 91   | 99   | 88   | 95   | 93   | 91   | 98   | 97.2 | 92   | 94   | 89   | 85   | 86   | 84 |    |    |    |    |    |
|      | <i>P.vitis</i> -X76560           | 16SrV     |     |     |     |     |     |     |      |      |      |     |      | 100  | 99   | 93   | 97.2 | 99   | 98   | 98   | 90   | 99   | 91   | 94  | 90   | 92   | 91   | 90   | 92   | 94   | 94  | 96   | 93   | 92   | 97.2 | 91   | 99   | 88   | 95   | 93   | 91   | 98   | 97.2 | 92   | 94   | 89   | 85   | 86 | 84 |    |    |    |    |
|      | <i>P.mali</i> -AJ542541          | 16SrX     |     |     |     |     |     |     |      |      |      |     |      |      | 100  | 99   | 93   | 97.2 | 99   | 98   | 98   | 90   | 99   | 91  | 94   | 90   | 92   | 91   | 90   | 92   | 94  | 94   | 96   | 93   | 92   | 97.2 | 91   | 99   | 88   | 95   | 93   | 91   | 98   | 97.2 | 92   | 94   | 89   | 85 | 86 | 84 |    |    |    |
|      | <i>P.prunorum</i> -AJ542544      | 16SrX     |     |     |     |     |     |     |      |      |      |     |      |      |      | 100  | 99   | 93   | 97.2 | 99   | 98   | 98   | 90   | 99  | 91   | 94   | 90   | 92   | 91   | 90   | 92  | 94   | 94   | 96   | 93   | 92   | 97.2 | 91   | 99   | 88   | 95   | 93   | 91   | 98   | 97.2 | 92   | 94   | 89 | 85 | 86 | 84 |    |    |
|      | <i>P.pyri</i> -AJ542543          | 16SrX     |     |     |     |     |     |     |      |      |      |     |      |      |      |      | 100  | 99   | 93   | 97.2 | 99   | 98   | 98   | 90  | 99   | 91   | 94   | 90   | 92   | 91   | 90  | 92   | 94   | 94   | 96   | 93   | 92   | 97.2 | 91   | 99   | 88   | 95   | 93   | 91   | 98   | 97.2 | 92   | 94 | 89 | 85 | 86 | 84 |    |
|      | <i>P.malaysianum</i> -EU371934   | 16SrXXXII |     |     |     |     |     |     |      |      |      |     |      |      |      |      |      | 100  | 99   | 93   | 97.2 | 99   | 98   | 98  | 90   | 99   | 91   | 94   | 90   | 92   | 91  | 90   | 92   | 94   | 94   | 96   | 93   | 92   | 97.2 | 91   | 99   | 88   | 95   | 93   | 91   | 98   | 97.2 | 92 | 94 | 89 | 85 | 86 | 84 |
| P9)  | <i>P.ziziphi</i> -AB052876       | 16SrV     |     |     |     |     |     |     |      |      |      |     |      | 100  | 92   | 98   | 98   | 97.2 | 97.2 | 91   | 98   | 90   | 93   | 91  | 91   | 90   | 91   | 91   | 93   | 95   | 95  | 94   | 91   | 96   | 90   | 98   | 87   | 94   | 92   | 90   | 97.2 | 96   | 91   | 93   | 90   | 84   | 85   | 83 |    |    |    |    |    |
| P10) | <i>P.spartii</i> -X92869         | 16SrX     |     |     |     |     |     |     |      |      |      |     |      |      | 100  | 90   | 92   | 91   | 91   | 88   | 92   | 88   | 90   | 87  | 88   | 87   | 87   | 89   | 90   | 88   | 89  | 88   | 88   | 90   | 89   | 92   | 83   | 92   | 89   | 86   | 91   | 91   | 85   | 88   | 85   | 81   | 82   | 82 |    |    |    |    |    |
| P11) | <i>P.sudamericanum</i> -GU292081 | 16SrVI    |     |     |     |     |     |     |      |      |      |     |      |      |      | 100  | 98   | 98   | 99   | 95   | 89   | 96   | 90   | 93  | 91   | 91   | 90   | 91   | 93   | 93   | 93  | 93   | 91   | 94   | 90   | 96   | 87   | 92   | 91   | 90   | 95   | 94   | 89   | 91   | 89   | 83   | 84   | 82 |    |    |    |    |    |
| P12) | <i>P.trifolii</i> -AY390261      | 16SrVI    |     |     |     |     |     |     |      |      |      |     |      |      |      |      | 100  | 99   | 99   | 95   | 89   | 96   | 90   | 93  | 91   | 91   | 90   | 91   | 93   | 93   | 95  | 92   | 91   | 96   | 90   | 98   | 87   | 94   | 92   | 90   | 97.2 | 96   | 91   | 93   | 88   | 84   | 85   | 83 |    |    |    |    |    |
| P13) | <i>P.fraxini</i> -AF092209       | 16SrVII   |     |     |     |     |     |     |      |      |      |     |      |      |      |      |      | 100  | 99   | 99   | 95   | 89   | 96   | 90  | 93   | 91   | 91   | 90   | 92   | 91   | 90  | 92   | 94   | 92   | 92   | 95   | 91   | 97.2 | 88   | 93   | 92   | 91   | 96   | 95   | 90   | 92   | 88   | 84 | 85 | 83 |    |    |    |
| P14) | <i>P.luffae</i> -AF086621        | 16SrVIII  |     |     |     |     |     |     |      |      |      |     |      |      |      |      |      |      | 100  | 92   | 97.2 | 89   | 92   | 90  | 89   | 88   | 90   | 92   | 92   | 94   | 91  | 90   | 95   | 93   | 97.2 | 86   | 97.2 | 95   | 89   | 96   | 95   | 92   | 87   | 83   | 84   | 82   |      |    |    |    |    |    |    |
| P15) | <i>P.phoenicium</i> -AF515636    | 16SrIX    |     |     |     |     |     |     |      |      |      |     |      |      |      |      |      |      |      | 100  | 89   | 86   | 88   | 88  | 87   | 88   | 88   | 88   | 90   | 85   | 89  | 90   | 91   | 80   | 95   | 93   | 84   | 90   | 95   | 89   | 86   | 88   | 84   | 78   | 81   | 77   |      |    |    |    |    |    |    |
| P16) | <i>P.cirsii</i> -KR869146        | 16SrXI    |     |     |     |     |     |     |      |      |      |     |      |      |      |      |      |      |      |      | 100  | 90   | 93   | 89  | 91   | 90   | 90   | 91   | 93   | 93   | 95  | 92   | 91   | 96   | 91   | 98   | 87   | 94   | 92   | 90   | 99   | 96   | 91   | 93   | 88   | 84   | 85   | 83 |    |    |    |    |    |
|      | <i>P.oryzae</i> -AB052873        | 16SrXI    |     |     |     |     |     |     |      |      |      |     |      |      |      |      |      |      |      |      |      | 100  | 90   | 93  | 89   | 91   | 90   | 90   | 91   | 93   | 93  | 95   | 92   | 91   | 96   | 91   | 98   | 87   | 94   | 92   | 90   | 99   | 96   | 91   | 93   | 88   | 84   | 85 | 83 |    |    |    |    |
|      | <i>P.cynodontis</i> -AJ550984    | 16SrXIV   |     |     |     |     |     |     |      |      |      |     |      |      |      |      |      |      |      |      |      | 100  | 90   | 93  | 89   | 91   | 90   | 90   | 91   | 93   | 93  | 95   | 92   | 91   | 96   | 91   | 98   | 87   | 94   | 92   | 90   | 99   | 96   | 91   | 93   | 88   | 84   | 85 | 83 |    |    |    |    |
|      | <i>P.rhamni</i> -JQ868449        | 16SrXX    |     |     |     |     |     |     |      |      |      |     |      |      |      |      |      |      |      |      |      | 100  | 90   | 93  | 89   | 91   | 90   | 90   | 91   | 93   | 93  | 95   | 92   | 91   | 96   | 91   | 98   | 87   | 94   | 92   | 90   | 99   | 96   | 91   | 93   | 88   | 84   | 85 | 83 |    |    |    |    |
| P17) | <i>P.australiense</i> -L76865    | 16SrXII   |     |     |     |     |     |     |      |      |      |     |      |      |      |      |      |      |      |      |      |      | 100  | 96  | 95   | 97.2 | 94   | 93   | 96   | 97.2 | 87  | 89   | 87   | 94   | 88   | 89   | 90   | 91   | 90   | 92   | 92   | 89   | 90   | 85   | 86   | 84   | 79   | 80 | 81 |    |    |    |    |
| P18) | <i>P.convulvuli</i> -JN833705    | 16SrXII   |     |     |     |     |     |     |      |      |      |     |      |      |      |      |      |      |      |      |      |      |      | 100 | 95   | 97.2 | 94   | 91   | 97.3 | 97.2 | 89  | 91   | 89   | 96   | 91   | 92   | 93   | 91   | 93   | 90   | 94   | 92   | 93   | 87   | 88   | 87   | 82   | 83 | 83 |    |    |    |    |
| P19) | <i>P.japonicum</i> -AB010425     | 16SrXII   |     |     |     |     |     |     |      |      |      |     |      |      |      |      |      |      |      |      |      |      |      |     | 100  | 98   | 95   | 90   | 97.3 | 96   | 88  | 90   | 88   | 94   | 88   | 90   | 89   | 92   | 91   | 89   | 93   | 88   | 89   | 84   | 85   | 85   | 78   | 79 | 82 |    |    |    |    |
| P20) | <i>P.fragariae</i> -DQ086423     | 16SrXII   |     |     |     |     |     |     |      |      |      |     |      |      |      |      |      |      |      |      |      |      |      |     |      | 100  | 97.2 | 90   | 99   | 98   | 88  | 92   | 88   | 96   | 89   | 90   | 91   | 94   | 91   | 89   | 95   | 90   | 91   | 85   | 87   | 85   | 80   | 81 | 84 |    |    |    |    |
|      | <i>P.solani</i> -AF248959        | 16SrXII   |     |     |     |     |     |     |      |      |      |     |      |      |      |      |      |      |      |      |      |      |      |     |      |      | 100  | 97.2 | 90   | 99   | 98  | 88   | 92   | 88   | 96   | 89   | 90   | 91   | 94   | 91   | 89   | 95   | 90   | 91   | 85   | 87   | 85   | 80 | 81 | 84 |    |    |    |
|      | <i>P.caricae</i> -AY725234       | 16SrXVII  |     |     |     |     |     |     |      |      |      |     |      |      |      |      |      |      |      |      |      |      |      |     |      |      | 100  | 97.2 | 90   | 99   | 98  | 88   | 92   | 88   | 96   | 89   | 90   | 91   | 94   | 91   | 89   | 95   | 90   | 91   | 85   | 87   | 85   | 80 | 81 | 84 |    |    |    |
| P21) | <i>P.hispanicum</i> -AF248960    | 16SrXIII  |     |     |     |     |     |     |      |      |      |     |      |      |      |      |      |      |      |      |      |      |      |     |      |      |      | 100  | 97.2 | 90   | 99  | 98   | 88   | 92   | 88   | 96   | 89   | 90   | 91   | 94   | 91   | 89   | 95   | 90   | 91   | 85   | 87   | 85 | 80 | 81 | 84 |    |    |
| P22) | <i>P.brasiliense</i> -AF147708   | 16SrXV    |     |     |     |     |     |     |      |      |      |     |      |      |      |      |      |      |      |      |      |      |      |     |      |      |      | 100  | 89   | 96   | 95  | 88   | 91   | 88   | 95   | 90   | 89   | 90   | 93   | 89   | 89   | 94   | 89   | 90   | 86   | 87   | 84   | 78 | 79 | 82 |    |    |    |
| P23) | <i>P.graminis</i> -AY725228      | 16SrXVI   |     |     |     |     |     |     |      |      |      |     |      |      |      |      |      |      |      |      |      |      |      |     |      |      |      | 100  | 90   | 92   | 88  | 88   | 88   | 88   | 90   | 89   | 84   | 88   | 90   | 88   | 91   | 89   | 87   | 86   | 84   | 77   | 77   | 78 |    |    |    |    |    |
| P24) | <i>P.americanum</i> -DQ174122    | 16SrXVIII |     |     |     |     |     |     |      |      |      |     |      |      |      |      |      |      |      |      |      |      |      |     |      |      |      | 100  | 97.3 | 89   | 92  | 88</ |      |      |      |      |      |      |      |      |      |      |      |      |      |      |      |    |    |    |    |    |    |
